# Supplementary material
Source: PubMed Central journal article supplement (PMC2852132)

Supplemental 1a

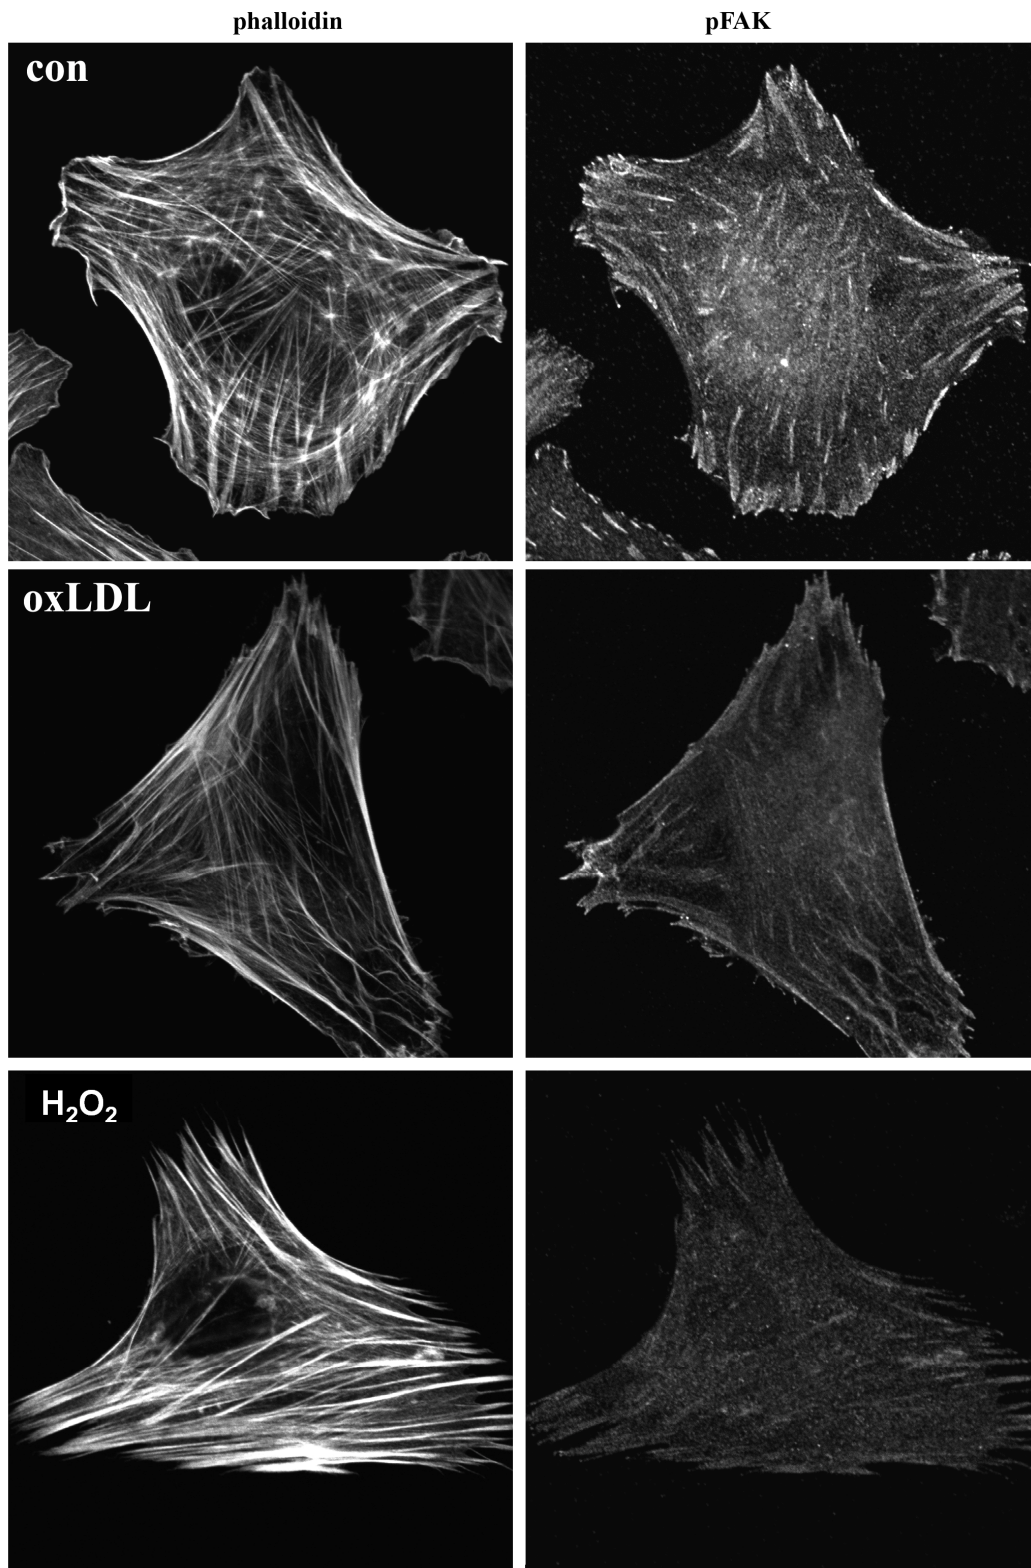

Supplemental 1b

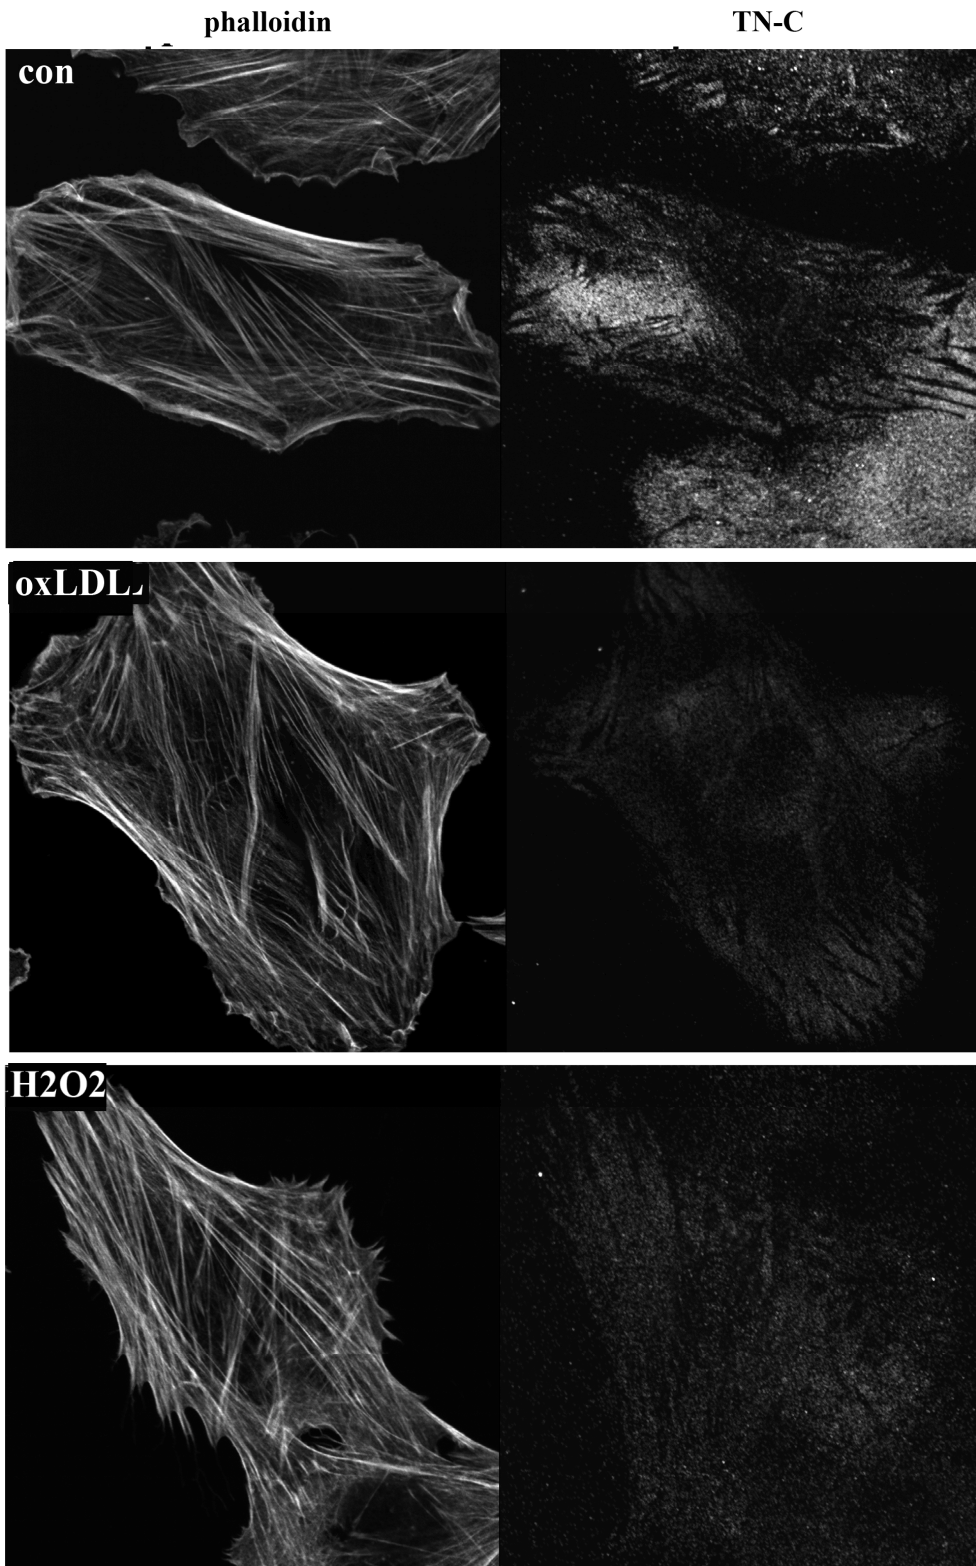

Supplement: NIHMS187742-supplement-01.pdf [file NIHMS187742-supplement-01.pdf]
